# Supplementary material for: Study of a Fire-Resistant Plate Containing Fly Ashes Generated from Municipal Waste Incinerator: Fire and Mechanical Characteristics and Environmental Life Cycle Assessment
Source: MDPI journal article supplement (doi:10.3390/ma17081813), 2024-04-15

## Supporting Information:

# Study of a Fire Resistance Plate Containing Fly Ashes Generated from Municipal Waste Incinerator: Fire and Mechanical Characteristics and Environmental Life Cycle Assessment

Begoña Peces<sup>1</sup>, Yolanda Luna-Galiano<sup>2</sup>, Fabiola Varela<sup>1</sup>, Bernabé Alonso-Fariñas<sup>2</sup> and Carlos Leiva<sup>2\*</sup>

**Figure S1.** The environmental impact of the distance from gypsum calcination to production. Refer to Figure 6 for details on the nomenclature's significance.

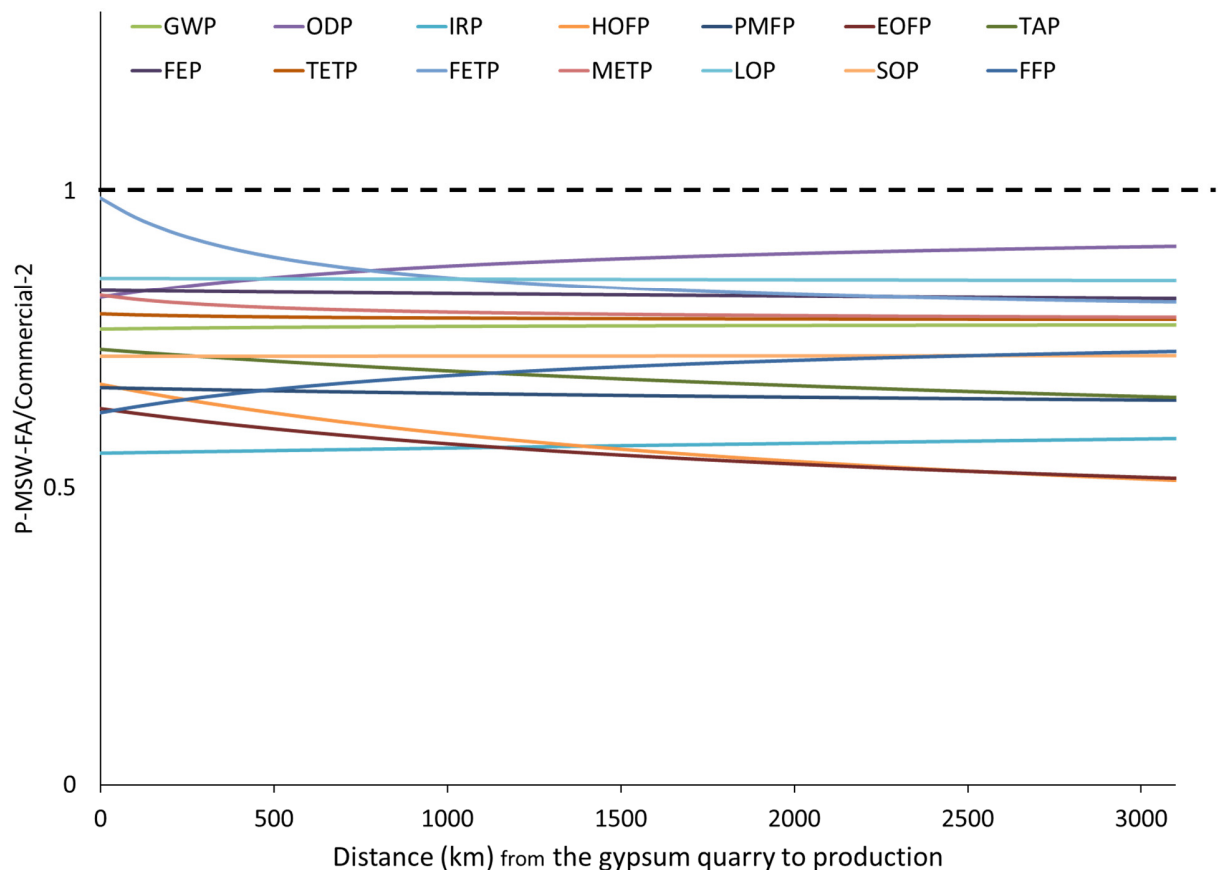

**Figure S2.** The environmental impact of the distance from vermiculite plant to production. Refer to Figure 6 for details on the nomenclature's significance.

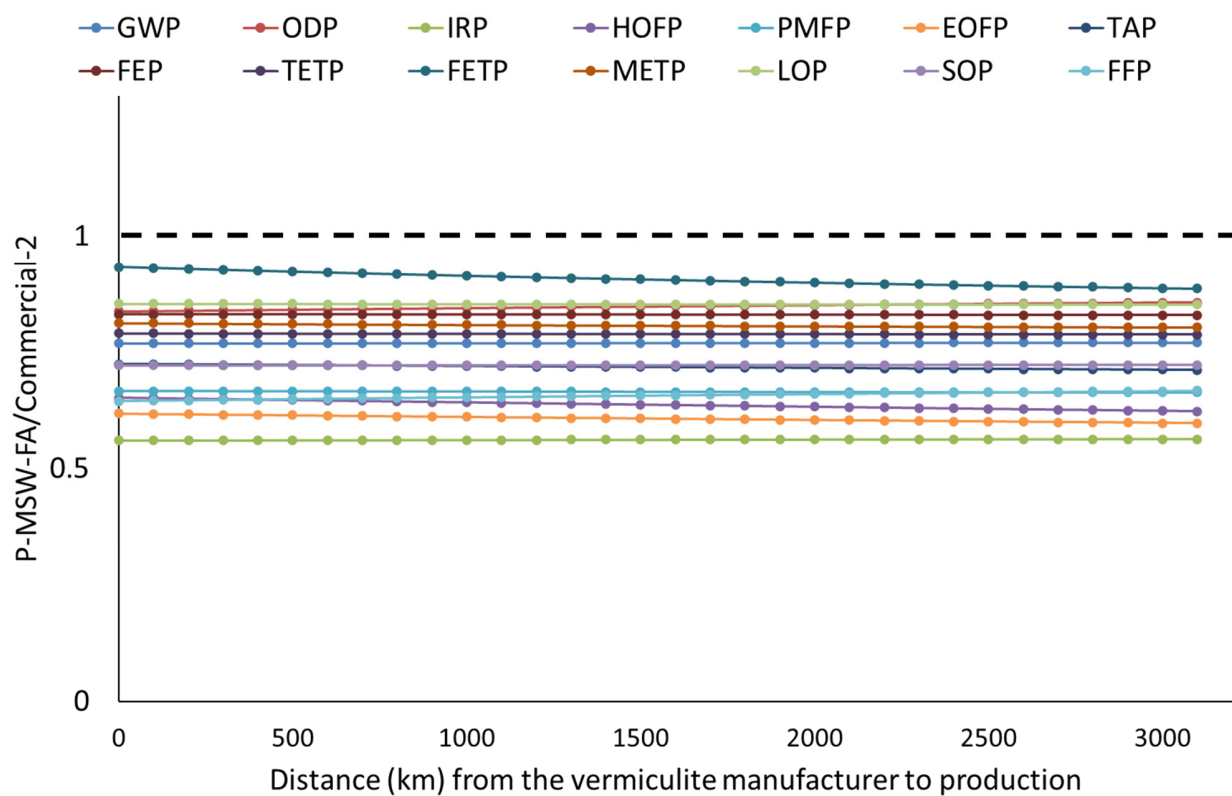

**Figure S3.** The environmental impact of the distance from glass fiber plant to production. Refer to Figure 6 for details on the nomenclature's significance.

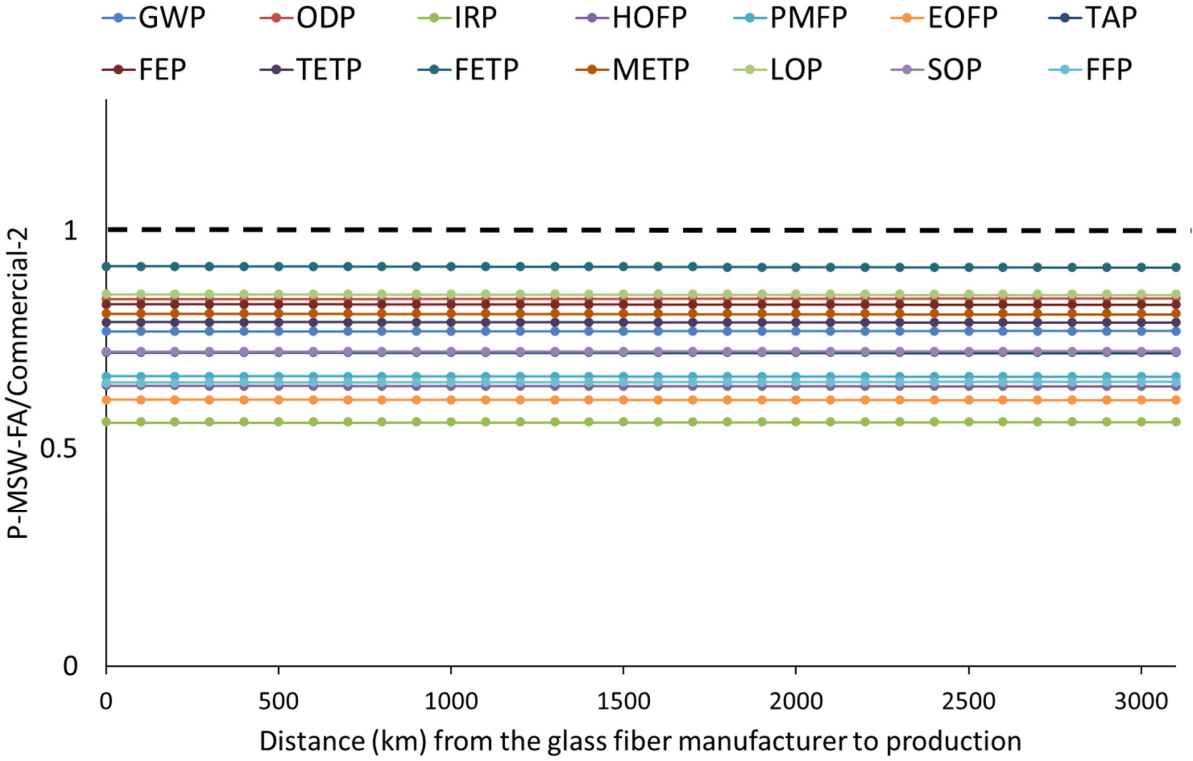

Supplement: s1 [file s1]
